# Supplementary material for: Photosensitive polydimethylsiloxane networks for adjustable-patterned films
Source: Royal Society of Chemistry journal article supplement (doi:10.1039/c7py00300e), 2017-01-01
Supplement: c7py00300e1.pdf [file c7py00300e1.pdf]

## Supporting information

### Photosensitive polydimethylsiloxane networks for adjustable-patterned films

Rachid Jellali<sup>a</sup>, Michaël Alexandre<sup>a</sup>, Christine Jérôme<sup>a,†</sup>

<sup>a</sup> Center for Education and Research on Macromolecules (CERM), CESAM, University of Liège, Sart-Tilman, B6, 4000 Liège, Belgium.

† Corresponding author: e-mail: c.jerome@ulg.ac.be

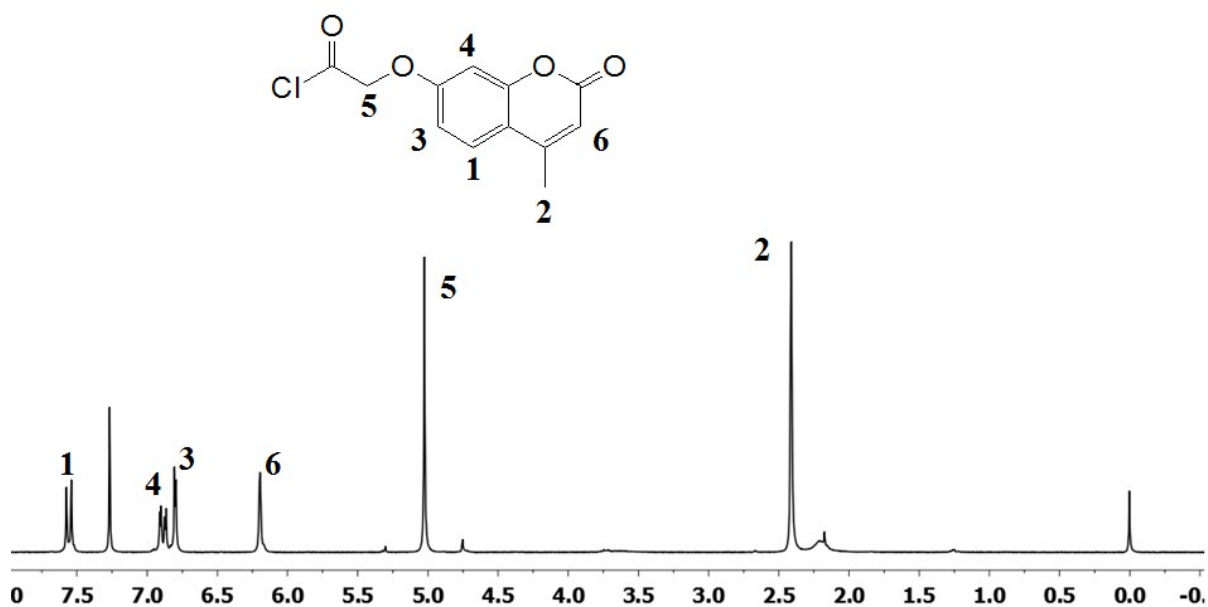

**Fig. SI-1** <sup>1</sup>H NMR spectra of 7-chlorocarbonylmethoxy-4-methylchromen-2-one (product 4).

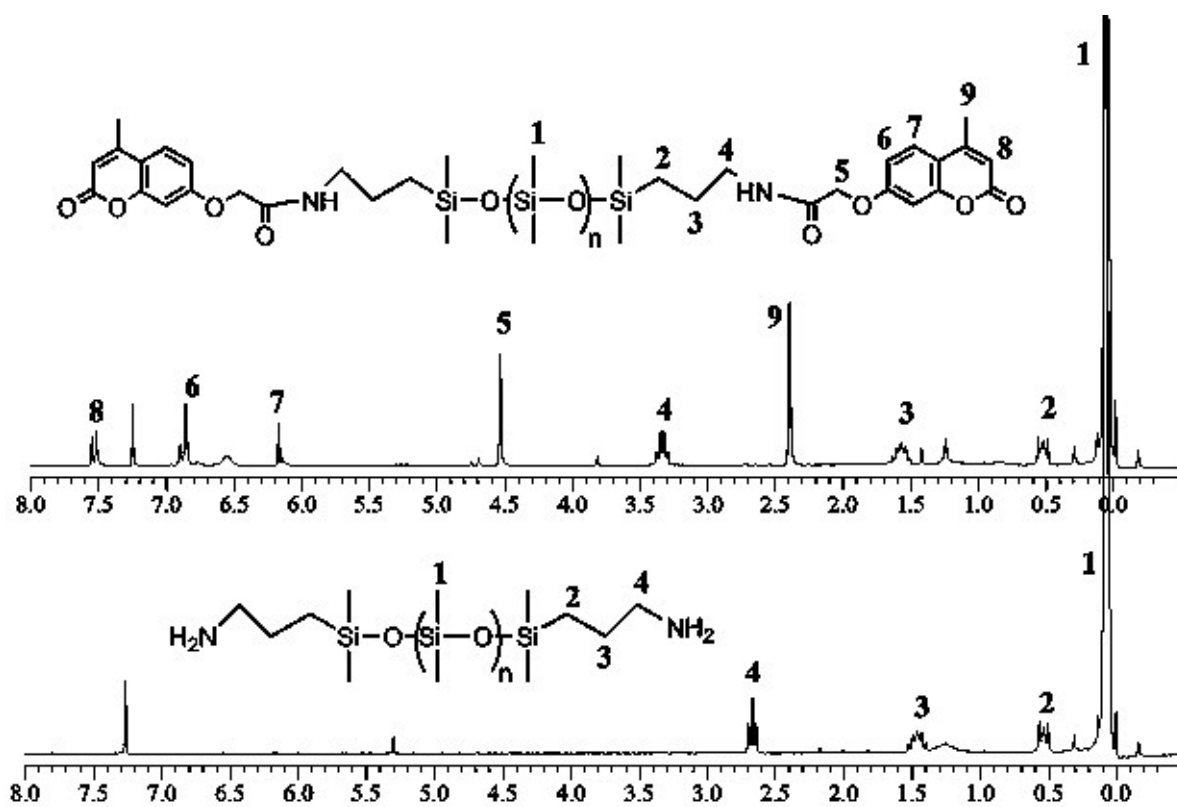

**Fig. SI-2** <sup>1</sup>H NMR spectra of di-amine terminated PDMS (1000 g/mol) and the resulting di-coumarin terminated PDMS (product 7).

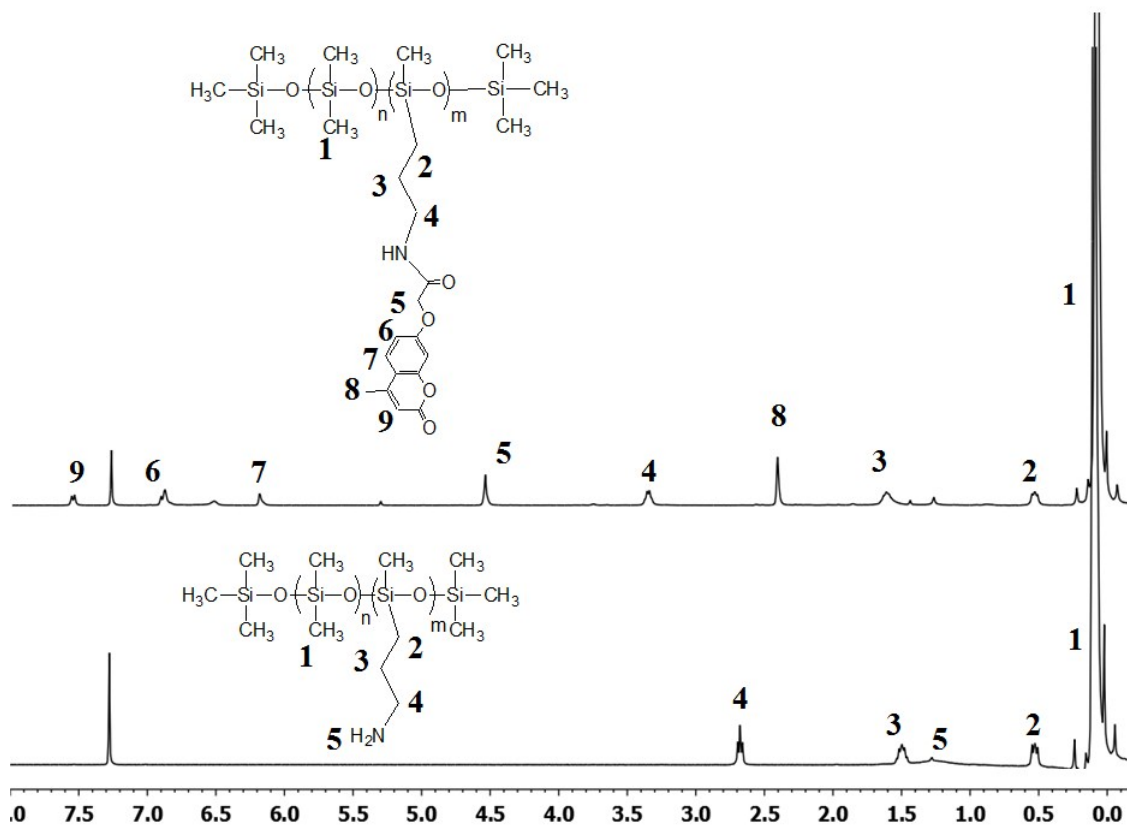

**Fig. SI-3** <sup>1</sup>H NMR spectra of aminopropylmethylsiloxane-co-dimethylsiloxane copolymers (product 6, 8000 g/mol) and the resulting Coumarin functionalized methylsiloxane-co-dimethylsiloxane (product 8).
